# Supplementary material for: HDAC Inhibition Enhances the In Vivo Efficacy of MEK Inhibitor Therapy in Uveal Melanoma
Source: Oxford University Press journal article supplement (doi:10.1158/1078-0432.ccr-18-3382), 2019-06-21
Supplement: 10780432ccr183382-sup-210508_3_supp_5577727_psw92m.xlsx [file 10780432ccr183382-sup-210508_3_supp_5577727_psw92m.xlsx]

## Sheet: suppl. Table S1
Supplementary Table S1– Antibodies used for protein expression in western blotting experiments
Antibody	Host	Dilution	Reference	Company
IGF1-R	Rabbit	1/1000	#3027	Cell Signaling®
ROR1	Mouse	1/1000	ab93041	Abcam®
ROR2	Rabbit	1/1000	ab137602	Abcam®
pAKT (T308)	Rabbit	1/1000	#2965	Cell Signaling®
AKT	Rabbit	1/1000	#9272	Cell Signaling®
BCL-2	Rabbit	1/1000	#2872	Cell Signaling®
Caspase-7	Rabbit	1/1000	#9492	Cell Signaling®
Parp	Rabbit	1/1000	#9542	Cell Signaling®
pFAK (Y576/577)	Rabbit	1/1000	#3281	Cell Signaling®
FAK	Rabbit	1/1000	#3285	Cell Signaling®
YAP	Rabbit	1/500	#8418	Cell Signaling®
CTGF	Rabbit	1/1000	#2899	Cell Signaling®
AREG	Rabbit	1/1000	ab33558	Abcam®
GAPDH	Mouse	1/4000	G8795	Sigma-Aldrich®
Vinculin	Mouse	1/5000	V9131	Sigma-Aldrich®

## Sheet: suppl. Table S2
Supplementary Table S2 – Assays used for gene expression in RT-qPCR experiments
Gene	Reference	Company
ROR1	Hs01374271_g1	LifeTechnologiesTM
ROR2	Hs00896176_m1	LifeTechnologiesTM
IGF1R	Hs00609566_m1	LifeTechnologiesTM
CTGF	Hs00170014_m1	LifeTechnologiesTM
CYR61	Hs00155479_m1	LifeTechnologiesTM
AREG	Hs00950669_m1	LifeTechnologiesTM
ANKRD1	Hs00173317_m1	LifeTechnologiesTM
YAP1	Hs00902712_g1	LifeTechnologiesTM
GAPDH	Hs99999905_m1	LifeTechnologiesTM

## Sheet: suppl. Table S3
Supplementary Table S3 – Antibodies used for protein expression in immunofluorescence experiments
Antibody	Host	Dilution	Reference	Company
YAP	(Alexa Fluor® 488 Conjugate)	01:50:00	#14729	Cell Signaling®

## Sheet: suppl. Table S4
Supplementary Table S4 – Inhibitory concentration 50% (IC50) of MEKi after 72h in uveal melanoma cell lines (nM)
Cell line	IC50 (nM) ± sd
92.1	71.96nM ± 3.21nM
Mel270	68.73nM ± 2.25nM
MP41	29.88nM ± 1.98nM
OMM1	25.93nM ± 1.14nM
MM28	98.59nM ± 2.03nM

## Sheet: suppl. Table S5
Supplementary Table S5 – Members of the GSEA GO_REGULATION_OF_PHOSPHATIDYLINOSITOL_3_KINASE_SIGNALING family
RASGRP1
HAX1
SEMA4D
STAMBP
FRS2
HCST
PIK3IP1
PIK3AP1
CRYBA1
CSF3
SERPINA12
NRG4
KLB
DAB2IP
DCN
AGT
HBEGF
EGF
EGFR
C3orf58
ERBB2
ERBB3
ERBB4
EREG
AKT1
F2
F2R
F2RL1
UNC5B
FGF1
FGF2
FGF3
FGF4
FGF5
FGF6
FGF7
FGF8
FGF9
FGF10
FGFR1
FGFR3
FGFR2
FGFR4
FGR
FLT1
FLT3
PIP5K1C
SIRT1
FSHR
FYN
GAB1
FBXL2
PPP1R16B
FGF20
GH1
FGF22
ANGPT1
GPER
GRB2
HCLS1
HGF
NRG1
IGF1
INS
IRS1
JAK2
CD80
CD86
NRG2
KDR
KIT
LCK
LEP
KITLG
MYOC
NEDD4
NKX3-1
NTRK2
TRAT1
WNT16
PDGFA
PDGFB
PDGFRA
PDGFRB
SERPINE2
PIK3CA
PIK3CB
PIK3CD
PIK3R1
PIK3R2
PIP4K2A
PLXNB1
PPARD
PPP2R5B
FGF19
PPP2R5C
PRR5
MAPK1
MAPK3
C19orf10
PDGFC
RELN
PTEN
PTK2
PTPN6
PTPN11
PTPN13
CCL5
SELP
SOX9
BTC
TEK
TGFB2
TSC2
TWIST1
UBE3A
VAV1
PIP4K2C
PRR5L
PDGFD
FGF23
PIP5K1A
PIP5K1B
PIP4K2B
CAT
IRS2
CBL
BECN1
FGF18
FGF17
FGF16
IER3
CD19
KLF4
KL
SLC9A3R1
CD28
ENTPD5

## Sheet: suppl. Table S6
Supplementary Table S6 – Members of the GSEA GO_TRANSMEMBRANE_RECEPTOR_PROTEIN_KINASE_ACTIVITY family
ALK
AXL
CRIM1
CSF1R
DDR1
DDR2
EFNA3
EFNA4
EFNB3
EGFR
EPHA5
EPHB2
EPHB6
ERBB3
ERBB4
FGFR1
FGFR4
FLT1
FLT3
FLT4
IGF1R
IGF2R
INSR
KDR
LTK
MERTK
MET
MST1R
MUSK
NRP1
NRP2
NTRK1
PDGFRA
PDGFRB
PDGFRL
PTK7
ROR1
ROR2
RYK
TEK
TIE1
TRIM27
TYRO3

## Sheet: suppl. Table S7
Supplementary Table S7 – Members of the GSEA GO_TRANSMEMBRANE_RECEPTOR_PROTEIN_TYROSINE_KINASE_ACTIVITY family
MERTK
CSF1R
EFNA3
EFNA4
EFNB3
EGFR
EPHA2
EPHA1
EPHA3
EPHA4
EPHA5
EPHA7
EPHA8
EPHB1
EPHB2
EPHB3
EPHB4
EPHB6
ERBB2
ERBB4
EFEMP1
FGFR1
FGFR3
FGFR2
FGFR4
FLT1
FLT3
FLT4
ALK
NPTN
EPHA10
EPHA6
IGF1R
IGF2R
INSR
INSRR
KDR
KIT
LTK
MET
MST1R
MUSK
NTRK1
NTRK2
NTRK3
ROR1
ROR2
DDR2
CRIM1
PDGFRA
PDGFRL
PDGFRB
FGFRL1
AXL
RET
TRIM27
ROS1
RYK
TEK
TIE1
TYRO3
DDR1
NRP2
NRP1

## Sheet: suppl. Table S8
Supplementary Table S8 – Members of the GSEA HIPPO_TARGETS family
FJX1
CCNE2
HMCN1
ZDHHC18
CCNE1
WWC1
SCRIB
SCRIB
TEAD4
PPP2CB
TSHZ1
YWHAZ
LLGL2
PTPN14
YAP1
CASP3
AJUBA
SAV1
AMOT
DCHS2
DCHS2
STK3
STK3
YWHAB
TAOK3
CSNK1E
ACTG1
RERE
TEAD3
TAOK1
SMAD1
PPP2R2D
MOB1A
PRKCI
FAT1
YWHAQ
PPP2R1A
YWHAE
LATS1
PARD3
MOB3B
CTGF
DCHS1
DCHS1
PARD6G
RASSF2
NPHP4
TAZ
TAOK2
TEAD1
LATS2
MOB2
LLGL1
WNT5A
LIX1L
MOB1B
MOB3A
AMOTL1
LIMD1
AMOTL2
WTIP
TJP1
CSNK1D
LPP
MEIS1
PRKCZ
MYC
TEAD2
TJP2
MPP5
MPDZ
DVL2
MAPK10
RASSF4
MOB3C
FAT4
FAT3
HIPK2

## Sheet: suppl. Table S9
Supplementary Table S9 – Members of the GSEA REACTOME_GPCR_LIGAND_BINDING Family
INSL5
LPAR6
CALCRL
RAMP2
RAMP1
RAMP3
NMUR1
CXCL13
CXCR6
GNB5
RRH
CYSLTR1
CCR9
CGA
CCL27
NMU
NPFFR2
PROKR1
UTS2
FZD10
GPR44
HRH3
CHRM1
CHRM2
PTH2
CHRM3
CHRM5
ADCYAP1
ADCYAP1R1
RLN3
RXFP2
CCR1
CCR2
CCR3
CCR4
CCR5
CCR6
CCR7
CCR8
CCBP2
LTB4R
CNR1
CNR2
PROKR2
NMS
ADM
ADORA1
TAAR1
ADORA2A
ADORA2B
CRH
CRHR2
ADORA3
ADRA1D
ADRA1B
ADRA1A
ADRA2A
ADRA2B
GPBAR1
CX3CR1
ADRB1
ADRB2
ADRB3
CD55
OXER1
DRD1
DRD2
DRD3
DRD5
AGT
AGTR1
AGTR2
APLNR
S1PR1
LPAR1
S1PR3
EDN1
EDN2
EDN3
EDNRA
EDNRB
EMR1
F2
F2R
F2RL1
F2RL2
OPN5
GPRC6A
LPAR3
FPR1
FPR2
FPR3
OPN3
NTSR2
FSHB
FSHR
GAST
DARC
FZD2
GABBR1
NPB
UTS2D
GALR1
GCG
GCGR
OPN1MW
GHRH
GHRHR
GHSR
GIP
GIPR
GPR77
P2RY10
GLP1R
GNAS
GNB1
GNB2
GNB3
GNG3
GNG4
GNG5
GNG7
GNG10
GNG11
GNGT1
GNGT2
GNRH1
GNRH2
GNRHR
CCR10
GPR4
XCR1
NPBWR1
NPBWR2
CXCR3
PRLHR
UTS2R
NPW
GPR17
GPR18
LPAR4
MCHR1
GPER
MLNR
GPR39
FFAR1
FFAR3
FFAR2
GRM1
GRM2
GRM3
GRM4
GRM6
GRM7
GRM8
CXCL1
CXCL2
CXCL3
GRP
GRPR
GPR132
ANXA1
HCRT
HCRTR1
HCRTR2
EMR2
TAAR6
HRH1
HRH2
HTR1A
HTR1B
HTR1D
HTR1E
HTR1F
HTR2A
HTR2B
HTR2C
HTR4
HTR5A
HTR6
HTR7
IAPP
HCAR2
O3FAR1
RXFP4
QRFP
APP
IHH
IL8
CXCR1
CXCR2
CXCL10
INSL3
KISS1
KNG1
NPSR1
LHB
LHCGR
CCL3L3
MC1R
MC2R
MC3R
MC4R
MC5R
CXCL9
MLN
MTNR1A
MTNR1B
NMB
NMBR
NPY
NPY1R
NPY2R
NPY5R
NTS
NTSR1
OPRD1
OPRK1
OPRL1
OPRM1
OXT
OXTR
P2RY1
P2RY2
P2RY4
P2RY6
P2RY11
DHH
HEBP1
PRLH
GAL
RXFP3
WNT16
CCRL1
PDYN
GHRL
GNG13
PENK
PF4
S1PR5
PMCH
PNOC
P2RY13
GNG2
WNT4
POMC
PPBP
AVP
AVPR1A
AVPR1B
PPY
AVPR2
PPYR1
GNG12
LTB4R2
CCL28
NMUR2
PYY
CXCR7
CYSLTR2
PTAFR
PTCH1
PTGDR
PTGER1
PTGER2
PTGER3
PTGER4
PTGFR
PTGIR
PTH
PTHLH
PTH1R
PTH2R
CXCL16
HRH4
GNB4
RXFP1
NPS
OPN1LW
RGR
RHO
RLN2
OPN1SW
BDKRB1
BDKRB2
SAA1
SCT
SCTR
CCL2
CCL3
CCL3L1
CCL4
CCL5
CCL7
CCL11
CCL16
CCL17
CCL19
CCL20
CCL21
CCL22
CCL25
CXCL6
CXCL11
CXCL5
XCL1
CX3CL1
CXCL12
NPFFR1
CXCR5
SHH
P2RY12
LOC649279
CCRL1P1
LOC652222
LOC652292
NPB
LOC653879
SMO
SST
SSTR1
SSTR2
SSTR3
SSTR4
SSTR5
BRS3
XCL2
TAC1
TACR2
TAC3
TACR1
TACR3
TBXA2R
C3
C3AR1
TRH
TRHR
TSHB
TSHR
C5
C5AR1
OPN1MW2
LOC728830
CCR2
LOC730002
LOC730413
CCL3L1
LOC730002
LOC731823
VIP
VIPR1
VIPR2
WNT1
WNT2
WNT3
WNT5A
WNT6
WNT7A
WNT7B
WNT8B
WNT10B
WNT11
WNT2B
WNT9A
WNT9B
CXCR4
FZD5
CALCA
CALCB
FZD3
ADM2
WNT10A
TAS1R2
TAS1R1
GPR68
FZD1
FZD4
FZD6
FZD7
FZD8
FZD9
TAAR8
TAS1R3
QRFPR
PROK1
MCHR2
CASR
KISS1R
EMR3
GPR65
GALR3
NPFF
PTCH2
S1PR4
GALR2
HCAR3
CCK
CCKAR
CCKBR
WNT3A
F2RL3
TAAR5
LPAR2
TAAR2
GPR55
S1PR2
GLP2R
OPN4
GNG8
GABBR2
CD97
P2RY14

## Sheet: suppl. Table S10
		Supplementary Table S10 – Compounds used in the drug screening
Screen number	CD#	RD#	Name	SYNONYM	Primary Targets
1	2	181	Olaparib	AZD2281	PARP-1
2	3	182	Niraparib	MK-4827	PARP-1,2
3	4	183	A-966492	NA	PARP inhibitor
4	5	184	MK-1775	AZD-1775	Wee1
5	6	134	BMS-754807	NA	IGF1R
6	7	126	Ponatinib	AP24534	BCR-ABL
7	8	117	Saracatinib	AZD0530	SFK, ABL
8	9	98	Midostaurin	PKC412	FLT3, KIT
9	10	106	Alisertib	MLN-8237	AURKA
10	11	199	ABT-751	NA	Tubulin
11	12	200	Linifanib	ABT-869	FLT-3, VEGFR-PDGFR
12	13	201	Acitretin	NA	retinoid receptor
13	14	202	Adapalene	NA	retinoid receptor
14	15	203	AEE-788	NA	multiple RTK
15	16	204	AG-490	NA	JAK, EGFR
16	17	205	Apatinib	YN968D1	VEGFR2
17	18	206	AT7519	NA	CDK
18	19	207	Cediranib	AZD2171	VEGFRs, PDGFRs, FGFR1
19	20	208	AZD8330	ARRY-424704	MEK
20	21	209	Sapitinib	AZD8931	EGFR, HER2, ERBB3
21	22	210	BMS 794833	NA	c-Met, VEGFR2
22	23	214	Avagacestat	BMS-708163	g-Secretase
23	24	215	Brivanib (alaninate)	BMS-582664 (prodrug of BMS-540215)	VEGFR
24	25	216	Dovitinib	TKI-258, CHIR-258	Multi Kinase Inhibitors (c-Kit, FGFR, FLT3,FMS, PDGFR, VEGFR)
25	26	217	CI-1040	PD184352	MEK (MKK)
26	27	218	Cilomilast	Ariflo, SB-207499	phosphodiesterase(pde)
27	28	219	Crenolanib	CP-868569	PDGFR
28	30	221	Deforolimus	MK-8669	mTOR
29	31	222	Lenvatinib	E7080	VEGFR, FGFR
30	32	223	Revolade	Eltrombopag (SB-497115-GR)	TpoR
31	33	224	ENMD-2076		AURKA, SRC, FLT, VEGFR
32	34	225	Ezetimibe	Zetia	?
33	36	213	NVP-BGJ398	BGJ398	FGFR
34	37	226	Fasudil	NA	PKA?, Rho kinase
35	38	227	GDC-0879	NA	B-Raf (V600E)
36	39	228	Gossypol	NA	Calcineurin; PKD
37	40	229	GSK2126458	NA	PI3K
38	41	230	GSK690693	NA	AKT
39	42	231	Ispinesib	SB-715992	kinesin KSP
40	43	232	ITF2357	Givinostat	HDAC
41	44	233	JNJ-26481585	NA	HDAC
42	47	236	KW-2478	NA	HSP90
43	48	237	LY2157299	NA	TGFBR
44	49	238	LY2603618	IC-83	CHK1
45	51	240	Masitinib	AB1010	c-Kit
46	52	241	MLN9708	NA	proteasome
47	53	242	MP-470	Amuvatinib	Multi Kinase Inhibitors (Flt3, Met, c-Kit, c-Ret & PDGFR)
48	54	243	NVP-BSK805		JAK2 (JAK3,1)
49	55	244	ON-01910	NA	PLK1
50	0	0	DMSO	DMSO
51	58	247	PKI-587	PF-05212384	PI3K/mTOR
52	59	248	R406	NA	SYK
53	60	249	Ritodrine hydrochloride	Yutopar	β-2 adrenergic receptor agonist
54	61	253	RO4929097	NA	y-Secretase inhibitor
55	62	254	SB743921	NA	Ksp
56	63	255	SGI-1776	NA	PIM1,2,3
57	64	256	SNS-314	NA	AUR
58	65	257	SRT1720	NA	SIRT1
59	66	258	TAK-733	NA	MEK1/2 (allosteric)
60	67	259	TAK-901	NA	AURKB
61	69	261	Telatinib (BAY 57-9352)	NA	Multi Kinase Inhibitors (c-Kit, VEGFR & PDGFR)
62	70	262	Temsirolimus	Torisel	mTOR/FKBP
63	71	263	Tipifarnib	Zarnestra	farnesyltransferase inhibitor
64	72	264	TW-37	NA	Bcl2
65	73	265	Vargatef	BIBF 1120	Multi Kinase Inhibitors (VEGF, PDGFR & FGFR)
66	74	266	Y-27632	NA	Rho kinase inhibitor
67	75	267	ZSTK474	NA	PI3K
68	76	268	Alendronate	NA	CD45; farnesyl diphosphate synthase
69	77	269	Levamisole	NA	alkaline phosphatase
70	79	271	Perifosine	NA	PLC/PKC/AKT
71	81	276	ABT-263	Navitoclax	Bcl-2 inhibitor
72	82	277	AC220	Quizartinib, AC010220	FLT3, FMS, cKIT, PDGFR
73	83	278	AN2728	NA	PDE4
74	84	279	Arry-162	MEK162	MEK
75	85	280	AS-703026	MSC1936369B	MEK1/2
76	86	281	AV-951	Tivozanib	VEGFR1,2,3
77	87	282	Axitinib	AG-013736	Multi Kinase Inhibitors (cKIT, PDGFR & VEGFR)
78	88	283	AZD8055	NA	mTORC1/2
79	89	284	Bexarotene	Targretin	RXR
80	90	285	BI6727 (Volasertib)	NA	PLK
81	91	286	BKM-120	NA	PI3K
82	92	287	BMS-777607	BMS777607	MET
83	93	315	Bicalutamide	Casodex, Cosudex	AR
84	94	289	CAL-101	GS-1101	PI3K-p110delta or gamma?
85	95	290	Carfilzomib	PX-171	proteasome (20S) inhibitor
86	96	291	CP-690550	Tasocitinib, Tofacitinib	JAK3
87	97	292	DCC-2036		ABL
88	98	293	FK-228	Romidepsin	HDACi
89	99	294	FTY720	Fingolimod	sphingosine
90	100	295	GDC-0941 (free base)	Pictilisib	PI3K
91	101	296	GDC-0980	NA	mTOR, PI3K
92	102	297	INK128	NA	mTORC1/2
93	103	190	Lestaurtinib	CEP-701	FLT3
94	104	298	Obatoclax	GX15-070MS	BCL2 BH3
95	105	299	Odanacatib	MK-0822	cathepsin K
96	106	300	OSI-027	NA	mTORC1/2
97	107	301	PF-04691502	NA	PI3K/mTOR
98	108	302	Pimecrolimus	Elidel	FKBP/Calcineurin
99	109	303	PLX4032	RG7204, Vemurafenib	BRAF
100	110	304	Ramatroban	Bay u3405	thromboxane receptor
101	111	305	Regorafenib	NA	VEGFR/RAF
102	112	306	SCH900776		CHK1
103	113	307	TG100-115	NA	PI3K g/d
104	115	309	Vatalanib	PTK-787	VEGFR, PDGFR, KIT
105	116	310	VX-11e		ERK
106	117	311	VX-765	NA	caspase-1
107	118	312	XL147	SAR245408	PI3K/mTOR
108	0	0	DMSO	DMSO
109	299	RD0505	Erismodegib	Sonidegib, LDE225	Smoothend
110	121	316	BMS-599626	NA	HER1/2/4
111	123	318	CUDC-101	CUDC101	HDAC,HER1/2
112	124	319	CYC-116	NA	AURKA/B, VEGFR2
113	125	320	CYT-387 (CYT11387)	CYT387, CYT11387	Jak 1,2
114	126	321	Dutasteride	Avodart	5-a reductase
115	127	322	EMD 1214063	EMD1214063	MET
116	128	323	Eprosartan Mesylate	Teveten	Angiotensin II R
117	129	324	Laropiprant	MK-0524	prostaglandin
118	130	325	MGCD0103	Mocetinostat	HDAC1
119	131	326	Motesanib	AMG-706	Multi Kinase Inhibitors (c-Kit, PDGFR, RET & VEGFR)
120	132	327	NVP-LDE225	NA	Hedgehog pathway
121	133	328	SCH727965	Dinaciclib	CDK1,2,9
122	134	329	TG101348	NA	JAK2
123	135	330	Varespladib	NA	PLA2
124	136	331	VX-702	NA	p38
125	137	332	XL184	Cabozantinib	MET, VEGFR2, FLT3, KIT, TIE2, RET
126	0	0	DMSO	DMSO
127	189	347	I-BET151	GSK1210151A
128	140	335	MLN-518	Tandutinib	FLT3, KIT, PDGFR, multikinase
129	141	156	BIBW-2992	Afatinib	EGFR/HER2
130	142	NA	Canertinib	CI-1033, PD183805	HER
131	300	RD0506	Glasdegib	PF-04449913	Smoothend
132	144	336	NVP-AUY922	VER-52296	HSP90
133	145	337	AZD6244	ARRY-142886, Selumetinib	MEK1/2, BRAF
134	146	NA	PD 0325901	NA	MEK1/2
135	147	338	MK-2206	NA	AKT
136	148	339	INCB018424	Ruxolitinib, INC424	JAK1,2
137	149	340	GSK1838705A	NA	ALK,IR,IGF1R
138	150	341	Rocilinostat	ACY-1215	HDAC6
139	151	342	AZD-5363		Akt
140	152	343	MLN-4924		NAE
141	153	344	LY-2940680		Hedgehog, Smoothend
142	154	354	NVP-BEZ 235	NA	PI3K/mTOR inhibitor
143	155	167	ABT-888	Veliparib	PARP-inhibitor
144	156	154	ARQ 197	Tivantinib	MET
145	157	139	AT9283	NA	AUR
146	158	64	Bafetinib	NA	ABL, LYN
147	159	133	Belinostat	PDX101	HDAC inhibitor
148	160	110	BI 2536	BI2536	PLK1
149	162	55	Bosutinib	SKI-606	ABL, SRC
150	164	85	Danusertib	NA	AUR
151	165	6	Dasatinib	Sprycel	Multi Kinase Inhibitors (Bcr-Abl, SRC, c-Kit & PDGFR)
152	166	87	Erlotinib	Tarceva	EGFR
153	167	30	Everolimus	Zortress, Afinitor, Certican	mTOR/FKBP
154	168	7	FK-506	Tacrolimus	FKBP/Calcineurin
155	169	137	GDC-0449	Vismodegib	Smoothend
156	170	4	Imatinib (free base or mesylate)	Gleevec	ABL, Bcr-Abl
157	171	88	Lapatinib (free base)	Tykerb	HER2, EGFR
158	172	121	LBH-589	Panobinostat	HDAC
159	173	136	MS-275	Entinostat	HDACi
160	174	5	Nilotinib	Tasigna	Bcr-Abl, c-Kit & PDGFR
161	175	135	OSI-906	NA	IGF1R
162	176	104	Pazopanib	GW-786034	VEGFR, PDGFR, KIT
163	177	168	PF-01367338	AG-014699, Rucaparib	PARP-1
164	178	112	PF-02341066	Crizotinib	ALK, MET
165	179	155	PF-04217903	NA	MET
166	180	8	Rapamycin	Sirolimus	FKBP/mTOR
167	181	89	Sorafenib (free base)	Nexavar	BRAF, PDGFR, VEGFR
168	182	90	Sunitinib (free base)	Sutent	Multi Kinase Inhibitors (CSF-1R, Flt3, c-Kit, PDGFR, RET & VEGFR)
169	301	RD0507	Entospletinib	GS-9973	SYK
170	184	151	Vandetanib	Zactima	EGFR, VEGFR, RET
171	185	91	Vorinostat	SAHA	HDAC inhibitor
172	186	83	VX-680	Tozasertib	Aurora kinase inhibitor
173	302	RD0508	Nintedanib	BIBF1120	VEGFR, FGFR, PDGFR
174	188	346	SB590885	NA	BRAF
175	190	348	RDEA119	BAY 869766	MEK
176	191	349	PD-0332991	NA	CDK4/6
177	192	NA	Roscovitine	Seliciclib	CDK
178	194	357	AZD7762	NA	CHK1
179	195	358	GSK2118436A	Dabrafenib	BRAF
180	196	158	Gefitinib	Iressa	EGFR
181	303	RD0509	MM-102		WD40 domain
182	29	220	DAPT (GSI-IX)	NA	g-Secretase
183	35	212	TSU-68	NA	PDGFRβ,FGFR1,Flk-1/KDR
184	45	234	JNJ-7706621	NA	AUR (CDK)
185	46	235	KW 2449	NA	AURK, FLT3
186	50	239	LY335979	NA	PGP
187	304	RD0510	AGI-5198	IDH-C35
188	68	260	TAME	NA	APC
189	78	270	Neratinib	NA	EGFR, HER
190	80	272	R788 (Fostamatinib/R935788)	NA	SYK
191	114	308	Tubacin	NA	HDAC6
192	122	317	Celastrol	NA	?
193	138	333	AZD1152(NOT HQPA=phosphate)	NA	AURKB
194	139	334	GSK1120212	NA	MEK1/2
195	0	0	DMSO
196	163	138	Cyclopamine	NA	Smoothend
197	193	350	SNS-032 (BMS387032)	NA	CDK
198	197	423	Ibrutinib	SR-11-183P2, PCI-32765	BTK
199	198	390	ABT-199	GDC-0199	BCL2 (not Bcl-xl)
200	199	391	Ana-12	NA	TRKB
201	200	392	ASP3026	ASP-3026, ASP 3026	ALK
202	201	393	AZD3463	NA	ALK, IGF1R
203	202	394	AZD5363	NA	AKT
204	203	395	Birinapant	TL32711	IAP
205	204	396	BMS-911543	NA	JAK2
206	205	397	BYL719	NA	PI3K
207	206	398	CH5424802	NA	ALK
208	207	399	EPZ-5676	NA	DOT1L
209	208	400	EPZ6438 (E7438)	E7438	EZH2
210	209	401	FRAX486	NA	PAK
211	210	402	GDC-0068	RG7440	AKT
212	211	403	GSK126	NA	EZH2
213	212	404	GSK2334470	NA	PDK1
214	213	405	LCL-161	NA	Smac
215	214	406	LDK378	NA	ALK
216	215	407	MK-3697	NA	orexin receptor
217	216	408	PF-03758309	NA	PAK
218	0	0	DMSO
219	218	410	AP26113	NA	EGFR, ALK, ROS1
220	219	411	Baricitinib	LY3009104, INCB028050	JAK1/2
221	220	412	BAY80-6946	Copanlisib	PI3K
222	221	413	IPI-145	INK1197	PI3K
223	222	414	LY2835219	NA	CDK4/6
224	223	415	LY2940680	NA	Smoothend
225	224	416	GDC-0032	NA	PI3K
226	225	417	GDC-0973	NA	MEK
227	226	418	GDC-0623	NA	MEK
228	227	419	Bioymifi	NA	DR5
229	305	RD0511	AGI-6780
230	229	421	INCB28060	INC280	MET
231	306	RD0512	LY3009120		Pan-Raf inhibitor
232	0	0	DMSO
233	232	211	AZD4547	NA	FGFR
234	233	380	BMN673	NA	PARP1
235	234	378	LY2090314	NA	GSK3
236	0	0	DMSO
237	236	373	PF573228	NA	FAK
238	237	177	PU-H71	NA	HSP90
239	238	424	AZD6482	NA	PI3K
240	239	426	Foretinib	Exel2880, GSK1363089G, XL880	MET, VEGFR2
241	240	RD0433	Ribociclib	LEE-011	CDK4/6
242	241	RD0447	Afuresertib	GSK2110183	AKT
243	242	RD0448	Uprosertib	GSK2141795, GSK795	AKT
244	243	RD0449	PF-06463922		ALK, ROS1
245	244	RD0450	Encorafenib	LGX818	BRAF
246	245	RD0451	Bromosporine		BRDs
247	246	RD0452	CPI-203		BRDs
248	247	RD0453	I-BET762	GSK525762	BRDs
249	248	RD0454	OTX015	Y-803	BRDs
250	249	RD0455	PFI-1	PF-6405761	BRDs
251	250	RD0456	RVX-208		BRDs
252	251	RD0457	SGC-CBP30		BRDs
253	0	0	DMSO
254	252	RD0458	LY294002		BRDs, PI3K
255	253	RD0459	CC-292	AVL-292	BTK
256	254	RD0460	Vidaza	5-Azacytine	DNMT
257	255	RD0461	RG108		DNMT
258	256	RD0462	Osimertinib	AZD9291, Mereletinib	EGFR T790M
259	257	RD0463	Rociletinib	CO-1686, AVL-301	EGFR T790M
260	258	RD0464	Ulixertinib	BVD-523, VRT752271	ERK
261	259	RD0465	SCH772984		ERKi
262	260	RD0466	Defactinib	VS-6063, PF-04554878	FAK
263	261	RD0467	LY3039478		g-Secretase
264	262	RD0468	C646		HAT
265	263	RD0469	Remodelin		HAT (NAT10)
266	264	RD0470	PCI-34051		HDAC
267	265	RD0471	Tacedinaline	CI994	HDAC
268	266	RD0472	CUDC-907		HDAC, PI3K
269	267	RD0473	ACY-241	CP-0009208-044	468
270	268	RD0474	ACY-957	CP-0006946-157	429.5
271	269	RD0475	ACY-1044	SP-0010566-055	405
272	270	RD0476	Tasquinimod
273	271	RD0477	BAY-872243	BAY 87-2243	HIF
274	272	RD0478	GSK-J4		Histone Demethylase
275	273	RD0479	GSK-LSD1		Histone Demethylase
276	274	RD0480	IOX1		Histone Demethylase
277	275	RD0481	JIB-04		Histone Demethylase
278	276	RD0482	ML324		Histone Demethylase
279	277	RD0483	OG-L002		Histone Demethylase
280	278	RD0484	A-366		HMT
281	279	RD0485	BIX-01294		HMT
282	280	RD0486	DZNep	3-deazaneplanocin A	HMT
283	281	RD0487	GSK343		HMT
284	282	RD0488	PFI-2		HMT
285	283	RD0489	SGC0946		HMT
286	284	RD0490	UNC0379		HMT
287	285	RD0491	UNC0638		HMT
288	286	RD0492	UNC0642		HMT
289	287	RD0493	UNC0646		HMT
290	288	RD0494	Restapimycin	IPI-504	HSP90
291	289	RD0495	Pacritinib	SB1518	JAK2/FLT3
292	290	RD0496	UNC1215		MBT domain
293	291	RD0497	UNC669		MBT domain
294	292	RD0498	AZD2014		mTOR
295	293	RD0499	Dacomitinib	PF-00299804	pan ErbB
296	294	RD0500	Apremilast	CC-10004	PDE4, TNFa
297	295	RD0501	Alpelisib	NVP-BYL719	PI3K
298	296	RD0502	Pilaralisib	XL147, SAR-245408	PI3Ka/d/g
299	297	RD0503	Selisistat	EX-527	Sirtuin, SIRT1
300	298	RD0504	LCL161		Smac

[truncated: 1 more sheets: suppl. Table 11]
